# Supplementary material for: Association of Circular RNA and Long Noncoding RNA Dysregulation to Clinical Response to Immunotherapy in Cutaneous Metastatic Melanoma
Source: Preprints.org preprint supplement (doi:10.20944/preprints202207.0162.v1), 2022-07-11
Supplement: Supplementary file 1 [file supplementary]

## Sheet: Hoja1
ceRNA	log2FoldChange_ceRNA	padj_ceRNA	miRNA	mRNA	log2FoldChange_mRNA	padj_mRNA
ENSG00000271856	3.14863	0.0300655	hsa-miR-1827	POU3F2	4.83058	0.013689
hsa-MX1_0002	5.38406	0.0463235	hsa-miR-4299	TMEM178B	4.00993	0.0131835
ENSG00000233355	3.60906	0.0228182	hsa-miR-4291	IP6K3	5.99169	0.00724202
ENSG00000232021	2.9273	0.00498261	hsa-miR-20a-3p	POU3F2	4.83058	0.013689
hsa-SYTL2_0003	3.33123	0.00993146	hsa-miR-10b-3p	HLA-B	1.94725	0.00493064
ENSG00000227036	1.64409	0.0431859	hsa-miR-15b-3p	COL4A4	3.30096	0.000164167
ENSG00000232021	2.9273	0.00498261	hsa-miR-1299	HLA-C	2.04588	0.00514673
ENSG00000232021	2.9273	0.00498261	hsa-miR-4685-3p	FRMD5	2.89805	0.0131835
hsa-SOX6_0020	5.00979	0.097351	hsa-miR-658	PRF1	3.2227	0.00498261
hsa-CPM_0002	3.93179	0.0432477	hsa-miR-6838-5p	PDCD1	3.45104	0.0125242
ENSG00000232021	2.9273	0.00498261	hsa-miR-513c-3p	LILRB1	3.24205	0.00253914
ENSG00000245164	3.19842	0.037211	hsa-miR-3123	EOMES	2.29204	0.0234184
ENSG00000235621	3.84501	0.0123476	hsa-miR-6825-5p	HLA-B	1.94725	0.00493064
ENSG00000205056	3.1868	0.0265618	hsa-miR-5197-3p	CCL3	3.77599	0.000559167
hsa-MX1_0002	5.38406	0.0463235	hsa-miR-766-3p	POU2AF1	5.30374	0.000570521
ENSG00000205056	3.1868	0.0265618	hsa-miR-4677-3p	LILRB4	2.92096	0.00459763
ENSG00000262001	1.51124	0.0355661	hsa-miR-5010-3p	LILRB4	2.92096	0.00459763
hsa-ITGA6_0030	5.42183	0.0547753	hsa-miR-6504-3p	PSMB9	2.2251	0.00871754
ENSG00000205056	3.1868	0.0265618	hsa-miR-449b-5p	JAKMIP1	3.64307	0.0158082
ENSG00000232021	2.9273	0.00498261	hsa-miR-4300	PARP9	1.55212	0.0490143
ENSG00000232021	2.9273	0.00498261	hsa-miR-4699-3p	HLA-DPB1	2.06254	0.0056232
ENSG00000232021	2.9273	0.00498261	hsa-miR-1285-3p	IL12RB1	3.38982	0.00426826
ENSG00000232021	2.9273	0.00498261	hsa-miR-339-5p	TMEM178B	4.00993	0.0131835
hsa-SLC6A6_0027	3.26328	0.0541318	hsa-miR-10392-3p	LTB	3.35599	0.0166473
hsa-HLA-DRB1_0004	3.90434	2.40664e-05	hsa-miR-198	CSF2RA	1.63545	0.0428371
hsa-TRIM22_0002	4.06087	0.0432477	hsa-miR-1184	EOMES	2.29204	0.0234184
ENSG00000232021	2.9273	0.00498261	hsa-miR-4254	HLA-DOA	2.12221	0.0227026
hsa-NRCAM_0112	6.49732	0.00963197	hsa-miR-3664-5p	ITK	2.9409	0.0180872
hsa-SOX6_0020	5.00979	0.097351	hsa-miR-650	CD6	2.7828	0.0380036
hsa-SOX6_0020	5.00979	0.097351	hsa-miR-504-5p	NCF4	2.01797	0.0431859
ENSG00000271856	3.14863	0.0300655	hsa-miR-802	CLEC4E	2.92714	0.00455144
hsa-SLC6A6_0027	3.26328	0.0541318	hsa-miR-1253	FCRL2	5.257	0.000620299
ENSG00000233355	3.60906	0.0228182	hsa-miR-4261	FRMD5	2.89805	0.0131835
hsa-ERBB3_0002	2.96296	0.0432477	hsa-miR-136-5p	CD3G	3.22162	0.0171758
ENSG00000233355	3.60906	0.0228182	hsa-miR-4747-5p	LILRB4	2.92096	0.00459763
ENSG00000235621	3.84501	0.0123476	hsa-miR-302a-3p	STRIP2	3.36196	0.00965457
hsa-RP11-219A15_0001	5.40024	0.0992498	hsa-miR-6762-3p	LAIR1	2.35744	0.00965457
ENSG00000205056	3.1868	0.0265618	hsa-miR-30a-3p	IGSF6	1.97005	0.0391679
ENSG00000232021	2.9273	0.00498261	hsa-miR-3911	MSR1	2.2579	0.0014696
ENSG00000234327	2.42046	0.034203	hsa-miR-206	PAX3	2.13687	0.0280567
ENSG00000262001	1.51124	0.0355661	hsa-miR-627-3p	LAIR1	2.35744	0.00965457
ENSG00000255760	3.9815	0.00967678	hsa-miR-6878-5p	LILRB4	2.92096	0.00459763
ENSG00000205056	3.1868	0.0265618	hsa-miR-922	PDCD1	3.45104	0.0125242
ENSG00000232021	2.9273	0.00498261	hsa-miR-3942-3p	HLA-DPA1	2.23302	0.00449041
ENSG00000262001	1.51124	0.0355661	hsa-miR-4723-5p	MAP4K1	2.23584	0.0488309
ENSG00000235621	3.84501	0.0123476	hsa-miR-5088-5p	PSMB9	2.2251	0.00871754
ENSG00000232021	2.9273	0.00498261	hsa-miR-4764-5p	HLA-DMA	1.91946	0.0301851
ENSG00000205056	3.1868	0.0265618	hsa-miR-3926	ABLIM3	2.79209	0.020117
hsa-CPM_0002	3.93179	0.0432477	hsa-miR-16-5p	SEL1L3	2.29919	0.0388209
ENSG00000222031	6.27615	0.0327364	hsa-miR-8485	LILRB4	2.92096	0.00459763
hsa-ERBB3_0002	2.96296	0.0432477	hsa-miR-3660	TMEM178B	4.00993	0.0131835
ENSG00000205056	3.1868	0.0265618	hsa-miR-548d-3p	SYT6	3.21833	0.0285572
ENSG00000247774	2.60045	0.0210956	hsa-miR-6799-3p	PAX3	2.13687	0.0280567
hsa-SLC6A6_0027	3.26328	0.0541318	hsa-miR-4457	HLA-DQA1	2.06133	0.0726077
hsa-SLC6A6_0027	3.26328	0.0541318	hsa-miR-4457	HLA-DQA1	2.06133	0.0726077
hsa-PMP22_0004	2.18164	0.0419928	hsa-miR-6828-3p	HLA-DQA1	2.06133	0.0726077
hsa-PMP22_0004	2.18164	0.0419928	hsa-miR-6828-3p	HLA-DQA1	2.06133	0.0726077
ENSG00000205056	3.1868	0.0265618	hsa-miR-513c-3p	LILRB1	3.24205	0.00253914
ENSG00000205056	3.1868	0.0265618	hsa-miR-6807-3p	FRMD5	2.89805	0.0131835
ENSG00000232021	2.9273	0.00498261	hsa-miR-6787-3p	LAIR1	2.35744	0.00965457
ENSG00000268027	3.36395	0.0323692	hsa-miR-2467-5p	PAX3	2.13687	0.0280567
ENSG00000205056	3.1868	0.0265618	hsa-miR-5088-5p	PSMB9	2.2251	0.00871754
ENSG00000205056	3.1868	0.0265618	hsa-miR-593-3p	LAIR1	2.35744	0.00965457
ENSG00000262001	1.51124	0.0355661	hsa-miR-3911	MSR1	2.2579	0.0014696
ENSG00000235621	3.84501	0.0123476	hsa-miR-6783-3p	LILRB4	2.92096	0.00459763
ENSG00000271856	3.14863	0.0300655	hsa-miR-6852-3p	LILRB4	2.92096	0.00459763
ENSG00000205056	3.1868	0.0265618	hsa-miR-1299	HLA-C	2.04588	0.00514673
hsa-CPM_0002	3.93179	0.0432477	hsa-miR-212-3p	MPEG1	1.7259	0.0459831
ENSG00000258733	2.49985	0.0111854	hsa-miR-1322	MS4A1	4.09919	0.000310179
hsa-CPM_0002	3.93179	0.0432477	hsa-miR-4534	HLA-DPA1	2.23302	0.00449041
ENSG00000258580	5.74281	0.0111854	hsa-miR-6734-5p	HLA-DQA1	2.06133	0.0726077
ENSG00000258580	5.74281	0.0111854	hsa-miR-6734-5p	HLA-DQA1	2.06133	0.0726077
ENSG00000255760	3.9815	0.00967678	hsa-miR-4536-5p	CCL5	3.35877	0.00118578
ENSG00000258733	2.49985	0.0111854	hsa-miR-4252	FCRL1	4.2964	0.00307544
ENSG00000245164	3.19842	0.037211	hsa-miR-513b-5p	KCNMA1	1.62981	0.0477124
ENSG00000205056	3.1868	0.0265618	hsa-miR-877-3p	HLA-E	1.5067	0.0257787
ENSG00000235621	3.84501	0.0123476	hsa-miR-3934-3p	LAIR1	2.35744	0.00965457
ENSG00000232021	2.9273	0.00498261	hsa-miR-2117	HKDC1	4.48453	0.0224232
ENSG00000233355	3.60906	0.0228182	hsa-miR-513b-5p	KCNMA1	1.62981	0.0477124
ENSG00000249096	2.76451	0.00106341	hsa-miR-7151-3p	HLA-E	1.5067	0.0257787
ENSG00000262001	1.51124	0.0355661	hsa-miR-4656	PAX3	2.13687	0.0280567
ENSG00000235621	3.84501	0.0123476	hsa-miR-4743-3p	HLA-DPB1	2.06254	0.0056232
ENSG00000261644	2.84318	0.0314018	hsa-miR-139-3p	SYT6	3.21833	0.0285572
ENSG00000232021	2.9273	0.00498261	hsa-miR-6828-3p	HLA-DQA1	2.06133	0.0726077
ENSG00000232021	2.9273	0.00498261	hsa-miR-6828-3p	HLA-DQA1	2.06133	0.0726077
ENSG00000227036	1.64409	0.0431859	hsa-miR-126-5p	ARL11	1.91223	0.0325382
ENSG00000255760	3.9815	0.00967678	hsa-miR-3160-5p	LAIR1	2.35744	0.00965457
ENSG00000232021	2.9273	0.00498261	hsa-miR-4267	STRIP2	3.36196	0.00965457
hsa-IFI30_0001	2.46459	0.0674996	hsa-miR-4768-5p	HLA-DOA	2.12221	0.0227026
ENSG00000258580	5.74281	0.0111854	hsa-miR-153-5p	LILRB4	2.92096	0.00459763
ENSG00000268001	1.72848	0.00933563	hsa-miR-6088	FRMD5	2.89805	0.0131835
ENSG00000266088	2.66924	0.0346701	hsa-miR-3182	WDFY4	2.45256	0.0366744
ENSG00000245164	3.19842	0.037211	hsa-miR-4651	HLA-DRA	2.50167	5.37375e-05
hsa-SLC6A6_0027	3.26328	0.0541318	hsa-miR-4264	TMEM178B	4.00993	0.0131835
ENSG00000271856	3.14863	0.0300655	hsa-miR-6867-5p	LAIR1	2.35744	0.00965457
hsa-ALDH1L2_0014	6.15037	0.00380608	hsa-miR-2117	HKDC1	4.48453	0.0224232
ENSG00000249096	2.76451	0.00106341	hsa-miR-4723-5p	MAP4K1	2.23584	0.0488309
ENSG00000235621	3.84501	0.0123476	hsa-miR-3689b-3p	IL12RB1	3.38982	0.00426826
ENSG00000249096	2.76451	0.00106341	hsa-miR-186-5p	THEMIS	2.69439	0.0431859
ENSG00000234663	2.4873	0.0366677	hsa-miR-3922-3p	COL4A4	3.30096	0.000164167
ENSG00000205056	3.1868	0.0265618	hsa-miR-4649-3p	HLA-DPB1	2.06254	0.0056232
hsa-IFI30_0001	2.46459	0.0674996	hsa-miR-499b-5p	HLA-DQA1	2.06133	0.0726077
hsa-IFI30_0001	2.46459	0.0674996	hsa-miR-499b-5p	HLA-DQA1	2.06133	0.0726077
hsa-MX1_0002	5.38406	0.0463235	hsa-miR-132-5p	TCTEX1D1	1.8022	0.0487337
ENSG00000258580	5.74281	0.0111854	hsa-miR-4659b-3p	HLA-DPB1	2.06254	0.0056232
ENSG00000205056	3.1868	0.0265618	hsa-miR-1285-3p	IL12RB1	3.38982	0.00426826
ENSG00000245164	3.19842	0.037211	hsa-miR-892c-5p	HLA-B	1.94725	0.00493064
ENSG00000272941	2.26638	0.0402298	hsa-miR-6770-5p	HLA-DOA	2.12221	0.0227026
ENSG00000178977	1.70843	0.019061	hsa-miR-4782-5p	LAIR1	2.35744	0.00965457
ENSG00000205056	3.1868	0.0265618	hsa-miR-6735-5p	HLA-DPA1	2.23302	0.00449041
ENSG00000255760	3.9815	0.00967678	hsa-miR-7156-3p	HLA-DPB1	2.06254	0.0056232
ENSG00000235621	3.84501	0.0123476	hsa-miR-3689c	HLA-DOA	2.12221	0.0227026
hsa-MX1_0002	5.38406	0.0463235	hsa-miR-764	ARL11	1.91223	0.0325382
hsa-UTRN_0056	1.59459	0.0772139	hsa-miR-4775	LILRB1	3.24205	0.00253914
ENSG00000255760	3.9815	0.00967678	hsa-miR-342-5p	LCP1	1.76711	0.020147
ENSG00000234663	2.4873	0.0366677	hsa-miR-875-5p	FCRL1	4.2964	0.00307544
ENSG00000255760	3.9815	0.00967678	hsa-miR-3120-5p	CCL4	3.68304	1.5957e-05
ENSG00000205056	3.1868	0.0265618	hsa-miR-612	SPN	2.48052	0.0477124
hsa-NRCAM_0112	6.49732	0.00963197	hsa-miR-4760-5p	HLA-DPB1	2.06254	0.0056232
ENSG00000256128	2.7291	0.0345801	hsa-miR-450b-5p	NUGGC	3.47058	0.013689
ENSG00000205056	3.1868	0.0265618	hsa-miR-545-5p	KCNMA1	1.62981	0.0477124
hsa-UTRN_0056	1.59459	0.0772139	hsa-miR-218-1-3p	THEMIS2	1.86025	0.0417391
ENSG00000227036	1.64409	0.0431859	hsa-miR-1303	KCNMA1	1.62981	0.0477124
ENSG00000255760	3.9815	0.00967678	hsa-miR-4482-3p	HLA-DPA1	2.23302	0.00449041
ENSG00000233355	3.60906	0.0228182	hsa-miR-1285-3p	IL12RB1	3.38982	0.00426826
ENSG00000268001	1.72848	0.00933563	hsa-miR-380-3p	B4GALT6	1.69475	0.00503247
ENSG00000249096	2.76451	0.00106341	hsa-miR-7106-5p	LILRB4	2.92096	0.00459763
hsa-HLA-DRB1_0004	3.90434	2.40664e-05	hsa-miR-10b-3p	HLA-B	1.94725	0.00493064
ENSG00000258580	5.74281	0.0111854	hsa-miR-627-3p	LAIR1	2.35744	0.00965457
ENSG00000205056	3.1868	0.0265618	hsa-miR-6758-3p	UBD	4.15645	0.0283384
hsa-ALDH1L2_0014	6.15037	0.00380608	hsa-miR-597-3p	HLA-DPB1	2.06254	0.0056232
ENSG00000271856	3.14863	0.0300655	hsa-miR-4797-3p	UBD	4.15645	0.0283384
ENSG00000233355	3.60906	0.0228182	hsa-miR-1243	ICOS	3.37614	0.00455144
ENSG00000258580	5.74281	0.0111854	hsa-miR-664a-3p	CYBB	2.65291	0.00345741
ENSG00000245164	3.19842	0.037211	hsa-miR-7515	HLA-DPB1	2.06254	0.0056232
hsa-MS4A1_0002	4.71748	0.097351	hsa-miR-4768-5p	HLA-DOA	2.12221	0.0227026
ENSG00000227036	1.64409	0.0431859	hsa-miR-4795-3p	CCL3	3.77599	0.000559167
ENSG00000261644	2.84318	0.0314018	hsa-miR-4728-5p	LILRB4	2.92096	0.00459763
ENSG00000227036	1.64409	0.0431859	hsa-miR-4313	TNFRSF12A	1.88608	0.0063688
ENSG00000233355	3.60906	0.0228182	hsa-miR-612	SPN	2.48052	0.0477124
hsa-ALDH1L2_0014	6.15037	0.00380608	hsa-miR-493-3p	NCKAP1L	2.01703	0.0477124
hsa-ALDH1L2_0014	6.15037	0.00380608	hsa-miR-4527	LILRB4	2.92096	0.00459763
ENSG00000234327	2.42046	0.034203	hsa-miR-620	LYZ	2.51266	0.00965457
hsa-SLC6A6_0027	3.26328	0.0541318	hsa-miR-12120	LILRB4	2.92096	0.00459763
ENSG00000205056	3.1868	0.0265618	hsa-miR-6721-5p	HLA-DMA	1.91946	0.0301851
ENSG00000245164	3.19842	0.037211	hsa-miR-6867-5p	LAIR1	2.35744	0.00965457
ENSG00000245164	3.19842	0.037211	hsa-miR-3064-5p	TMEM178B	4.00993	0.0131835
hsa-IFI30_0001	2.46459	0.0674996	hsa-miR-296-5p	CD6	2.7828	0.0380036
ENSG00000227036	1.64409	0.0431859	hsa-miR-2355-3p	LILRB4	2.92096	0.00459763
ENSG00000235621	3.84501	0.0123476	hsa-miR-6791-5p	HLA-DMA	1.91946	0.0301851
ENSG00000256128	2.7291	0.0345801	hsa-miR-1285-3p	IL12RB1	3.38982	0.00426826
ENSG00000205056	3.1868	0.0265618	hsa-miR-186-5p	THEMIS	2.69439	0.0431859
hsa-CD74_0005	3.5108	9.45889e-07	hsa-miR-3119	IKZF3	3.05976	0.020031
ENSG00000245164	3.19842	0.037211	hsa-miR-8063	PSMB9	2.2251	0.00871754
ENSG00000262001	1.51124	0.0355661	hsa-miR-4770	HLA-DOA	2.12221	0.0227026
ENSG00000237484	2.33759	0.0432583	hsa-miR-4795-3p	CCL3	3.77599	0.000559167
hsa-ALDH1L2_0014	6.15037	0.00380608	hsa-miR-8057	HLA-DPA1	2.23302	0.00449041
ENSG00000234327	2.42046	0.034203	hsa-miR-3155b	LAIR1	2.35744	0.00965457
ENSG00000245164	3.19842	0.037211	hsa-miR-6722-3p	HLA-DOA	2.12221	0.0227026
hsa-MX1_0002	5.38406	0.0463235	hsa-miR-4691-5p	PAX3	2.13687	0.0280567
hsa-MX1_0002	5.38406	0.0463235	hsa-miR-15a-3p	ADAMDEC1	3.44714	0.00426681
ENSG00000245164	3.19842	0.037211	hsa-miR-6757-5p	HLA-DMA	1.91946	0.0301851
ENSG00000205056	3.1868	0.0265618	hsa-miR-214-5p	NCKAP1L	2.01703	0.0477124
ENSG00000245164	3.19842	0.037211	hsa-miR-134-5p	KIAA0040	1.70226	0.0418741
ENSG00000234327	2.42046	0.034203	hsa-miR-452-3p	CD4	2.04259	0.0487337
ENSG00000271856	3.14863	0.0300655	hsa-miR-224-5p	TMEM178B	4.00993	0.0131835
ENSG00000245164	3.19842	0.037211	hsa-miR-4775	LILRB1	3.24205	0.00253914
ENSG00000245164	3.19842	0.037211	hsa-miR-6515-5p	HLA-E	1.5067	0.0257787
ENSG00000249096	2.76451	0.00106341	hsa-miR-6829-5p	LAIR1	2.35744	0.00965457
hsa-PTPRC_0003	2.36325	0.0718443	hsa-miR-181a-5p	PAX5	3.84652	0.0226363
ENSG00000232021	2.9273	0.00498261	hsa-miR-377-3p	B4GALT6	1.69475	0.00503247
ENSG00000247774	2.60045	0.0210956	hsa-miR-6884-5p	HLA-DPB1	2.06254	0.0056232
ENSG00000234663	2.4873	0.0366677	hsa-miR-6783-3p	LILRB4	2.92096	0.00459763
ENSG00000233355	3.60906	0.0228182	hsa-miR-944	THEMIS	2.69439	0.0431859
hsa-IFI30_0001	2.46459	0.0674996	hsa-miR-4771	HLA-DPB1	2.06254	0.0056232
ENSG00000268001	1.72848	0.00933563	hsa-miR-876-5p	KLHL6	2.35134	0.0280028
ENSG00000261644	2.84318	0.0314018	hsa-miR-9500	HLA-B	1.94725	0.00493064
ENSG00000261644	2.84318	0.0314018	hsa-miR-6785-5p	TAP1	2.26066	0.0153936
hsa-MX1_0002	5.38406	0.0463235	hsa-miR-3124-3p	HLA-DPB1	2.06254	0.0056232
ENSG00000266088	2.66924	0.0346701	hsa-miR-4656	PAX3	2.13687	0.0280567
ENSG00000227036	1.64409	0.0431859	hsa-miR-3173-5p	PAX3	2.13687	0.0280567
hsa-UTRN_0056	1.59459	0.0772139	hsa-miR-548aw	HLA-E	1.5067	0.0257787
ENSG00000253190	4.32055	0.00163898	hsa-miR-5001-3p	LILRA1	3.11522	0.0162853
ENSG00000205056	3.1868	0.0265618	hsa-miR-510-5p	HLA-DOA	2.12221	0.0227026
ENSG00000249096	2.76451	0.00106341	hsa-miR-15b-5p	SEL1L3	2.29919	0.0388209
ENSG00000268001	1.72848	0.00933563	hsa-miR-1972	FCRL2	5.257	0.000620299
ENSG00000247774	2.60045	0.0210956	hsa-miR-6757-5p	HLA-DMA	1.91946	0.0301851
hsa-RP11-219A15_0001	5.40024	0.0992498	hsa-miR-1587	PAX3	2.13687	0.0280567
ENSG00000262001	1.51124	0.0355661	hsa-miR-939-3p	HLA-DMA	1.91946	0.0301851
ENSG00000237484	2.33759	0.0432583	hsa-miR-1260b	TMEM178B	4.00993	0.0131835
ENSG00000237484	2.33759	0.0432583	hsa-miR-4747-5p	LILRB4	2.92096	0.00459763
ENSG00000255760	3.9815	0.00967678	hsa-miR-214-5p	NCKAP1L	2.01703	0.0477124
hsa-HLA-DRB1_0005	4.06661	8.09267e-07	hsa-let-7f-2-3p	HVCN1	1.95059	0.0286839
ENSG00000245164	3.19842	0.037211	hsa-miR-4797-3p	UBD	4.15645	0.0283384
ENSG00000227039	2.89841	0.0157114	hsa-miR-6722-3p	HLA-DOA	2.12221	0.0227026
ENSG00000237152	2.25086	0.0130419	hsa-miR-3605-5p	TIGIT	3.43312	0.00426681
ENSG00000255760	3.9815	0.00967678	hsa-miR-623	TMEM178B	4.00993	0.0131835
ENSG00000256039	4.05087	0.0470474	hsa-miR-4743-3p	HLA-DPB1	2.06254	0.0056232
ENSG00000256039	4.05087	0.0470474	hsa-miR-4276	GZMK	3.63537	0.00493064
ENSG00000233355	3.60906	0.0228182	hsa-miR-4309	TNFRSF11B	3.52962	0.000138891
ENSG00000261644	2.84318	0.0314018	hsa-miR-4468	HLA-DPB1	2.06254	0.0056232
ENSG00000262001	1.51124	0.0355661	hsa-miR-4659b-3p	HLA-DPB1	2.06254	0.0056232
ENSG00000205056	3.1868	0.0265618	hsa-miR-623	TMEM178B	4.00993	0.0131835
ENSG00000237484	2.33759	0.0432583	hsa-miR-4743-3p	HLA-DPB1	2.06254	0.0056232
hsa-CD74_0005	3.5108	9.45889e-07	hsa-miR-5088-5p	PSMB9	2.2251	0.00871754
ENSG00000227036	1.64409	0.0431859	hsa-miR-6778-3p	LAIR1	2.35744	0.00965457
ENSG00000268001	1.72848	0.00933563	hsa-miR-944	THEMIS	2.69439	0.0431859
hsa-TRIM22_0002	4.06087	0.0432477	hsa-miR-4743-3p	HLA-DPB1	2.06254	0.0056232
ENSG00000234663	2.4873	0.0366677	hsa-miR-7152-5p	HLA-DPB1	2.06254	0.0056232
hsa-CD38_0001	5.6013	0.0491759	hsa-miR-4781-3p	HLA-DPB1	2.06254	0.0056232
ENSG00000247774	2.60045	0.0210956	hsa-miR-4478	SLA2	2.5007	0.0454861
ENSG00000261644	2.84318	0.0314018	hsa-miR-4725-3p	CCL5	3.35877	0.00118578
ENSG00000268027	3.36395	0.0323692	hsa-miR-7851-3p	PSMB9	2.2251	0.00871754
ENSG00000237484	2.33759	0.0432583	hsa-miR-6833-3p	HLA-DOA	2.12221	0.0227026
ENSG00000267265	2.15064	0.0365486	hsa-miR-450b-3p	IKZF1	2.4181	0.0288296
hsa-MX1_0002	5.38406	0.0463235	hsa-miR-6792-3p	HLA-DPA1	2.23302	0.00449041
ENSG00000256128	2.7291	0.0345801	hsa-miR-1245b-3p	FRMD5	2.89805	0.0131835
ENSG00000256128	2.7291	0.0345801	hsa-miR-326	TMEM178B	4.00993	0.0131835
ENSG00000238045	1.72355	0.0487337	hsa-miR-6734-5p	HLA-DQA1	2.06133	0.0726077
ENSG00000238045	1.72355	0.0487337	hsa-miR-6734-5p	HLA-DQA1	2.06133	0.0726077
ENSG00000237484	2.33759	0.0432583	hsa-miR-4801	HLA-DRA	2.50167	5.37375e-05
ENSG00000233355	3.60906	0.0228182	hsa-miR-4784	HLA-DQA1	2.06133	0.0726077
ENSG00000233355	3.60906	0.0228182	hsa-miR-4784	HLA-DQA1	2.06133	0.0726077
hsa-NRCAM_0112	6.49732	0.00963197	hsa-miR-296-3p	ABLIM3	2.79209	0.020117
hsa-CD74_0005	3.5108	9.45889e-07	hsa-miR-194-3p	NCKAP1L	2.01703	0.0477124
ENSG00000253190	4.32055	0.00163898	hsa-miR-3911	MSR1	2.2579	0.0014696
ENSG00000268001	1.72848	0.00933563	hsa-miR-125a-3p	IL21R	3.26259	0.011839
ENSG00000205056	3.1868	0.0265618	hsa-miR-34a-5p	PNOC	4.28979	0.0449487
ENSG00000233355	3.60906	0.0228182	hsa-miR-450b-5p	NUGGC	3.47058	0.013689
hsa-PARP14_0007	2.05131	0.0674996	hsa-miR-6750-5p	HLA-DPB1	2.06254	0.0056232
ENSG00000272941	2.26638	0.0402298	hsa-miR-6127	TAP1	2.26066	0.0153936
ENSG00000205056	3.1868	0.0265618	hsa-miR-19a-5p	ZNF831	3.18629	0.0117386
ENSG00000205056	3.1868	0.0265618	hsa-miR-6828-3p	HLA-DQA1	2.06133	0.0726077
ENSG00000205056	3.1868	0.0265618	hsa-miR-6828-3p	HLA-DQA1	2.06133	0.0726077
ENSG00000204261	2.31775	4.98793e-05	hsa-miR-1299	HLA-C	2.04588	0.00514673
ENSG00000261644	2.84318	0.0314018	hsa-miR-6515-5p	HLA-E	1.5067	0.0257787
ENSG00000204261	2.31775	4.98793e-05	hsa-miR-6881-3p	HLA-E	1.5067	0.0257787
hsa-TRIM22_0002	4.06087	0.0432477	hsa-miR-4782-5p	LAIR1	2.35744	0.00965457
ENSG00000238045	1.72355	0.0487337	hsa-miR-6780a-5p	HLA-DOA	2.12221	0.0227026
ENSG00000234663	2.4873	0.0366677	hsa-miR-4279	CD274	2.24244	0.0363937
hsa-TRIM22_0002	4.06087	0.0432477	hsa-miR-3182	WDFY4	2.45256	0.0366744
ENSG00000261644	2.84318	0.0314018	hsa-miR-149-3p	POU2AF1	5.30374	0.000570521
ENSG00000227036	1.64409	0.0431859	hsa-miR-4516	CCL4	3.68304	1.5957e-05
ENSG00000237152	2.25086	0.0130419	hsa-miR-6833-3p	HLA-DOA	2.12221	0.0227026
ENSG00000227036	1.64409	0.0431859	hsa-miR-7152-5p	HLA-DPB1	2.06254	0.0056232
ENSG00000245164	3.19842	0.037211	hsa-miR-3179	POU2AF1	5.30374	0.000570521
ENSG00000234663	2.4873	0.0366677	hsa-miR-4774-3p	LAIR1	2.35744	0.00965457
ENSG00000227036	1.64409	0.0431859	hsa-miR-483-3p	SAMD9	2.23694	0.0318637
hsa-UTRN_0056	1.59459	0.0772139	hsa-miR-548f-5p	HLA-DOA	2.12221	0.0227026
ENSG00000238045	1.72355	0.0487337	hsa-miR-4677-3p	LILRB4	2.92096	0.00459763
ENSG00000232021	2.9273	0.00498261	hsa-miR-3922-3p	COL4A4	3.30096	0.000164167
ENSG00000227036	1.64409	0.0431859	hsa-miR-4739	TAP1	2.26066	0.0153936
ENSG00000261644	2.84318	0.0314018	hsa-miR-3605-5p	TIGIT	3.43312	0.00426681
ENSG00000247774	2.60045	0.0210956	hsa-miR-4505	PAX5	3.84652	0.0226363
ENSG00000271856	3.14863	0.0300655	hsa-miR-5590-3p	ZNF831	3.18629	0.0117386
ENSG00000237484	2.33759	0.0432583	hsa-miR-513c-3p	LILRB1	3.24205	0.00253914
ENSG00000245164	3.19842	0.037211	hsa-miR-6756-5p	HLA-DQA1	2.06133	0.0726077
ENSG00000245164	3.19842	0.037211	hsa-miR-6756-5p	HLA-DQA1	2.06133	0.0726077
ENSG00000237484	2.33759	0.0432583	hsa-miR-501-5p	SH2D1A	2.80471	0.0487337
ENSG00000255760	3.9815	0.00967678	hsa-miR-198	CSF2RA	1.63545	0.0428371
ENSG00000245164	3.19842	0.037211	hsa-miR-146b-5p	MS4A1	4.09919	0.000310179
hsa-HLA-DRB1_0005	4.06661	8.09267e-07	hsa-miR-127-5p	SLC7A7	1.85201	0.0257787
hsa-MX1_0002	5.38406	0.0463235	hsa-miR-922	PDCD1	3.45104	0.0125242
ENSG00000256128	2.7291	0.0345801	hsa-miR-6762-5p	HLA-DOA	2.12221	0.0227026
ENSG00000238045	1.72355	0.0487337	hsa-miR-4691-3p	HLA-DPA1	2.23302	0.00449041
ENSG00000234663	2.4873	0.0366677	hsa-miR-664a-3p	CYBB	2.65291	0.00345741
hsa-MS4A1_0002	4.71748	0.097351	hsa-miR-2117	HKDC1	4.48453	0.0224232
ENSG00000233355	3.60906	0.0228182	hsa-miR-1252-5p	POU2AF1	5.30374	0.000570521
ENSG00000205056	3.1868	0.0265618	hsa-miR-361-5p	GAPT	1.9688	0.0273034
ENSG00000205056	3.1868	0.0265618	hsa-miR-656-3p	COL4A3	3.0129	0.00645666
ENSG00000235621	3.84501	0.0123476	hsa-miR-4298	ITGB3	4.27148	0.00503247
ENSG00000233355	3.60906	0.0228182	hsa-miR-3908	COL4A3	3.0129	0.00645666
hsa-IFI30_0001	2.46459	0.0674996	hsa-miR-6505-3p	LILRB4	2.92096	0.00459763
ENSG00000255760	3.9815	0.00967678	hsa-miR-943	ITK	2.9409	0.0180872
ENSG00000247774	2.60045	0.0210956	hsa-miR-3929	ZNF831	3.18629	0.0117386
ENSG00000205056	3.1868	0.0265618	hsa-miR-146a-5p	MS4A1	4.09919	0.000310179
ENSG00000247774	2.60045	0.0210956	hsa-miR-450b-3p	IKZF1	2.4181	0.0288296
hsa-CDR1_0001	-2.71777	0.0772139	hsa-miR-4308	STXBP5L	-3.98829	0.000113206
hsa-CDR1_0001	-2.71777	0.0772139	hsa-miR-514a-3p	KIAA1549	-2.68992	0.0301242
hsa-CDR1_0001	-2.71777	0.0772139	hsa-miR-7-5p	DCX	-3.33852	0.0477124
hsa-CDR1_0001	-2.71777	0.0772139	hsa-miR-3166	POU4F1	-3.42819	0.0128688
hsa-CDR1_0001	-2.71777	0.0772139	hsa-miR-552-3p	SLC8A3	-3.88756	0.00503247
hsa-SLIT2_0013	-3.07822	0.097351	hsa-miR-4504	DPP10	-4.72843	0.0433804
hsa-SLIT2_0013	-3.07822	0.097351	hsa-miR-17-3p	ZFHX4	-3.01481	0.00650267
hsa-SLIT2_0013	-3.07822	0.097351	hsa-miR-505-5p	LRFN5	-3.97299	0.00307544
ENSG00000215808	-4.68829	0.0378212	hsa-miR-300	VASH2	-3.55237	0.0198929
ENSG00000215808	-4.68829	0.0378212	hsa-miR-1286	RORB	-2.93675	0.0234838
ENSG00000215808	-4.68829	0.0378212	hsa-miR-1262	TET1	-2.13704	0.0478143
ENSG00000215808	-4.68829	0.0378212	hsa-miR-4282	DACH1	-2.6581	0.0292171
ENSG00000215808	-4.68829	0.0378212	hsa-miR-3915	MEIS2	-2.60467	0.0168225
ENSG00000241158	-3.194	0.0111854	hsa-miR-1297	ST6GAL2	-4.39965	0.0250187
ENSG00000241158	-3.194	0.0111854	hsa-miR-335-5p	STXBP5L	-3.98829	0.000113206
ENSG00000241158	-3.194	0.0111854	hsa-miR-27b-3p	KCTD8	-4.13172	0.0079851
ENSG00000241158	-3.194	0.0111854	hsa-miR-3145-3p	ENPEP	-1.89205	0.0166986
ENSG00000241158	-3.194	0.0111854	hsa-miR-4273	EPHA7	-4.5165	0.00229469
ENSG00000241158	-3.194	0.0111854	hsa-miR-3682-3p	FUT9	-7.00745	0.0333022
ENSG00000241158	-3.194	0.0111854	hsa-miR-1273d	DGKB	-3.52336	0.0295124
ENSG00000241158	-3.194	0.0111854	hsa-miR-589-3p	LRRC17	-4.37925	0.00129537
ENSG00000241158	-3.194	0.0111854	hsa-miR-2114-3p	KIAA1549	-2.68992	0.0301242
ENSG00000241158	-3.194	0.0111854	hsa-miR-2115-3p	CSMD1	-4.37368	0.0420004
ENSG00000241158	-3.194	0.0111854	hsa-miR-646	ZFHX4	-3.01481	0.00650267
ENSG00000241158	-3.194	0.0111854	hsa-miR-579-3p	PTPRD	-2.77341	0.0371438
ENSG00000241158	-3.194	0.0111854	hsa-miR-589-5p	CNTFR	-4.37949	0.0184695
ENSG00000241158	-3.194	0.0111854	hsa-miR-3689d	BRSK2	-3.84437	0.0288296
ENSG00000241158	-3.194	0.0111854	hsa-miR-5580-5p	SYT7	-2.49463	0.0318637
ENSG00000241158	-3.194	0.0111854	hsa-miR-4733-3p	ASIC1	-2.3285	0.00724736
ENSG00000241158	-3.194	0.0111854	hsa-miR-1302	SMAD9	-1.70349	0.00839916
ENSG00000241158	-3.194	0.0111854	hsa-miR-3674	DACH1	-2.6581	0.0292171
ENSG00000241158	-3.194	0.0111854	hsa-miR-4452	MEIS2	-2.60467	0.0168225
ENSG00000241158	-3.194	0.0111854	hsa-miR-4297	HIF3A	-3.69055	0.0283599
ENSG00000237222	-4.3173	0.0438654	hsa-miR-3164	ST6GAL2	-4.39965	0.0250187
ENSG00000237222	-4.3173	0.0438654	hsa-miR-3909	NUDT11	-3.87869	0.000693986
ENSG00000237222	-4.3173	0.0438654	hsa-miR-3614-3p	PTPRD	-2.77341	0.0371438
ENSG00000237222	-4.3173	0.0438654	hsa-miR-581	TUB	-2.58324	1.88469e-07
ENSG00000237222	-4.3173	0.0438654	hsa-miR-1251-5p	FLRT2	-2.70537	0.0301687
ENSG00000251095	-3.04301	0.0395974	hsa-miR-3978	DPP10	-4.72843	0.0433804
ENSG00000251095	-3.04301	0.0395974	hsa-miR-16-1-3p	SPHKAP	-5.93769	0.0045546
ENSG00000251095	-3.04301	0.0395974	hsa-miR-548c-3p	EPHA3	-3.49115	0.0324845
ENSG00000251095	-3.04301	0.0395974	hsa-miR-3909	NUDT11	-3.87869	0.000693986
ENSG00000251095	-3.04301	0.0395974	hsa-miR-551b-5p	DCX	-3.33852	0.0477124
ENSG00000251095	-3.04301	0.0395974	hsa-miR-144-3p	ZFHX4	-3.01481	0.00650267
ENSG00000251095	-3.04301	0.0395974	hsa-miR-579-3p	PTPRD	-2.77341	0.0371438
ENSG00000251095	-3.04301	0.0395974	hsa-miR-147a	IGF2	-6.37624	0.00503247
ENSG00000251095	-3.04301	0.0395974	hsa-miR-218-2-3p	SYT7	-2.49463	0.0318637
ENSG00000251095	-3.04301	0.0395974	hsa-miR-411-5p	FLRT2	-2.70537	0.0301687
ENSG00000251095	-3.04301	0.0395974	hsa-miR-486-5p	GABRB3	-3.3138	0.0456517
ENSG00000251095	-3.04301	0.0395974	hsa-miR-181b-3p	MEIS2	-2.60467	0.0168225
ENSG00000251095	-3.04301	0.0395974	hsa-miR-4271	IGF2BP1	-7.63704	3.86053e-06
ENSG00000251095	-3.04301	0.0395974	hsa-miR-590-3p	DOK6	-2.67895	0.000571098
ENSG00000251095	-3.04301	0.0395974	hsa-miR-4476	CECR2	-3.1475	0.0252137
ENSG00000248174	-5.02602	0.0177502	hsa-miR-3148	IGF2BP1	-7.63704	3.86053e-06
ENSG00000250658	-4.93134	0.0461889	hsa-miR-663b	STXBP5L	-3.98829	0.000113206
ENSG00000250658	-4.93134	0.0461889	hsa-miR-330-5p	EPHX2	-2.25155	0.0183099
ENSG00000250658	-4.93134	0.0461889	hsa-miR-708-5p	CNTFR	-4.37949	0.0184695
ENSG00000250658	-4.93134	0.0461889	hsa-miR-4443	SYT7	-2.49463	0.0318637
ENSG00000250658	-4.93134	0.0461889	hsa-miR-548p	MEIS2	-2.60467	0.0168225
ENSG00000250786	-3.06004	0.00974524	hsa-miR-381-3p	VASH2	-3.55237	0.0198929
ENSG00000250786	-3.06004	0.00974524	hsa-miR-615-5p	IGF2	-6.37624	0.00503247
ENSG00000248131	-6.58386	0.0215775	hsa-miR-92b-3p	ST6GAL2	-4.39965	0.0250187
ENSG00000248131	-6.58386	0.0215775	hsa-miR-548ac	DPP10	-4.72843	0.0433804
ENSG00000248131	-6.58386	0.0215775	hsa-miR-548b-5p	EPHA3	-3.49115	0.0324845
ENSG00000248131	-6.58386	0.0215775	hsa-miR-3611	TECRL	-6.97864	0.00106341
ENSG00000248131	-6.58386	0.0215775	hsa-miR-641	ENPEP	-1.89205	0.0166986
ENSG00000248131	-6.58386	0.0215775	hsa-miR-4326	DCHS2	-5.55869	0.0026364
ENSG00000248131	-6.58386	0.0215775	hsa-miR-338-5p	EPHA7	-4.5165	0.00229469
ENSG00000248131	-6.58386	0.0215775	hsa-miR-548x-3p	DGKB	-3.52336	0.0295124
ENSG00000248131	-6.58386	0.0215775	hsa-miR-548a-5p	ZFHX4	-3.01481	0.00650267
ENSG00000248131	-6.58386	0.0215775	hsa-miR-3617-5p	DNAJC12	-2.80058	0.0470474
ENSG00000248131	-6.58386	0.0215775	hsa-miR-142-5p	DOK6	-2.67895	0.000571098
ENSG00000248624	-3.25542	0.00650267	hsa-miR-2276-3p	ALDH1A2	-3.99072	0.00908954
ENSG00000261757	-4.89148	0.0308634	hsa-miR-519d-3p	VASH2	-3.55237	0.0198929
ENSG00000261757	-4.89148	0.0308634	hsa-miR-4668-5p	DPP10	-4.72843	0.0433804
ENSG00000261757	-4.89148	0.0308634	hsa-miR-548c-3p	EPHA3	-3.49115	0.0324845
ENSG00000261757	-4.89148	0.0308634	hsa-miR-3613-3p	SCD5	-2.01099	0.0140911
ENSG00000261757	-4.89148	0.0308634	hsa-miR-641	ENPEP	-1.89205	0.0166986
ENSG00000261757	-4.89148	0.0308634	hsa-miR-338-5p	EPHA7	-4.5165	0.00229469
ENSG00000261757	-4.89148	0.0308634	hsa-miR-494-3p	PCDH19	-3.78648	0.00466438
ENSG00000261757	-4.89148	0.0308634	hsa-miR-548t-5p	ZFHX4	-3.01481	0.00650267
ENSG00000261757	-4.89148	0.0308634	hsa-miR-3614-3p	PTPRD	-2.77341	0.0371438
ENSG00000261757	-4.89148	0.0308634	hsa-miR-4709-3p	CNTFR	-4.37949	0.0184695
ENSG00000261757	-4.89148	0.0308634	hsa-miR-3681-5p	FAT3	-3.4243	0.0290241
ENSG00000261757	-4.89148	0.0308634	hsa-miR-3617-5p	DNAJC12	-2.80058	0.0470474
ENSG00000261757	-4.89148	0.0308634	hsa-miR-4282	DACH1	-2.6581	0.0292171
ENSG00000261757	-4.89148	0.0308634	hsa-miR-513a-3p	JPH4	-4.79235	0.00839916
ENSG00000261757	-4.89148	0.0308634	hsa-miR-3148	IGF2BP1	-7.63704	3.86053e-06
ENSG00000236714	-4.42996	0.0105674	hsa-miR-4668-5p	DPP10	-4.72843	0.0433804
ENSG00000236714	-4.42996	0.0105674	hsa-miR-3613-3p	SCD5	-2.01099	0.0140911
ENSG00000236714	-4.42996	0.0105674	hsa-miR-607	ZFHX4	-3.01481	0.00650267
ENSG00000236714	-4.42996	0.0105674	hsa-miR-577	DACH1	-2.6581	0.0292171
ENSG00000236714	-4.42996	0.0105674	hsa-miR-513a-3p	JPH4	-4.79235	0.00839916
ENSG00000236714	-4.42996	0.0105674	hsa-miR-590-3p	DOK6	-2.67895	0.000571098
ENSG00000228495	-3.90877	0.0172922	hsa-miR-4496	DPP10	-4.72843	0.0433804
ENSG00000228495	-3.90877	0.0172922	hsa-miR-340-5p	EPHA3	-3.49115	0.0324845
ENSG00000228495	-3.90877	0.0172922	hsa-miR-3185	STXBP5L	-3.98829	0.000113206
ENSG00000228495	-3.90877	0.0172922	hsa-miR-3916	ENPEP	-1.89205	0.0166986
ENSG00000228495	-3.90877	0.0172922	hsa-miR-299-3p	EPHA7	-4.5165	0.00229469
ENSG00000228495	-3.90877	0.0172922	hsa-miR-4429	PCDH19	-3.78648	0.00466438
ENSG00000228495	-3.90877	0.0172922	hsa-miR-32-3p	UNC5D	-4.77814	0.0487337
ENSG00000228495	-3.90877	0.0172922	hsa-miR-2110	ZFHX4	-3.01481	0.00650267
ENSG00000228495	-3.90877	0.0172922	hsa-miR-2861	PTPRD	-2.77341	0.0371438
ENSG00000228495	-3.90877	0.0172922	hsa-miR-1324	DACH1	-2.6581	0.0292171
ENSG00000228495	-3.90877	0.0172922	hsa-miR-412-3p	FLRT2	-2.70537	0.0301687
ENSG00000228495	-3.90877	0.0172922	hsa-miR-525-5p	MEIS2	-2.60467	0.0168225
ENSG00000228495	-3.90877	0.0172922	hsa-miR-92a-2-5p	IGF2BP1	-7.63704	3.86053e-06
ENSG00000233491	-6.54173	0.000421441	hsa-miR-9-5p	LRRTM4	-4.31152	0.0366744
ENSG00000233491	-6.54173	0.000421441	hsa-miR-548aj-3p	DPP10	-4.72843	0.0433804
ENSG00000233491	-6.54173	0.000421441	hsa-miR-3185	STXBP5L	-3.98829	0.000113206
ENSG00000233491	-6.54173	0.000421441	hsa-miR-556-3p	TECRL	-6.97864	0.00106341
ENSG00000233491	-6.54173	0.000421441	hsa-miR-3613-3p	SCD5	-2.01099	0.0140911
ENSG00000233491	-6.54173	0.000421441	hsa-miR-182-5p	NRN1	-2.32809	0.011713
ENSG00000233491	-6.54173	0.000421441	hsa-miR-548x-3p	DGKB	-3.52336	0.0295124
ENSG00000233491	-6.54173	0.000421441	hsa-miR-7-5p	DCX	-3.33852	0.0477124
ENSG00000233491	-6.54173	0.000421441	hsa-miR-3200-5p	UNC5D	-4.77814	0.0487337
ENSG00000233491	-6.54173	0.000421441	hsa-miR-367-5p	ZFHX4	-3.01481	0.00650267
ENSG00000233491	-6.54173	0.000421441	hsa-miR-519e-5p	ANKRD30A	-6.60203	0.00152466
ENSG00000233491	-6.54173	0.000421441	hsa-miR-4282	DACH1	-2.6581	0.0292171
ENSG00000233491	-6.54173	0.000421441	hsa-miR-4452	MEIS2	-2.60467	0.0168225
ENSG00000233491	-6.54173	0.000421441	hsa-miR-889-3p	DOK6	-2.67895	0.000571098
ENSG00000254235	-6.37274	0.00974524	hsa-miR-9-5p	LRRTM4	-4.31152	0.0366744
ENSG00000254235	-6.37274	0.00974524	hsa-miR-1178-3p	NRN1	-2.32809	0.011713
ENSG00000254235	-6.37274	0.00974524	hsa-miR-374a-3p	PCLO	-2.67785	0.0476229
ENSG00000254235	-6.37274	0.00974524	hsa-miR-3200-5p	UNC5D	-4.77814	0.0487337
ENSG00000254235	-6.37274	0.00974524	hsa-miR-550a-3p	RORB	-2.93675	0.0234838
ENSG00000254235	-6.37274	0.00974524	hsa-miR-578	GAS2	-5.44875	0.000724233
ENSG00000254235	-6.37274	0.00974524	hsa-miR-519e-5p	ANKRD30A	-6.60203	0.00152466
ENSG00000254235	-6.37274	0.00974524	hsa-miR-1304-5p	MEIS2	-2.60467	0.0168225
ENSG00000265194	-4.15836	0.0440269	hsa-miR-589-3p	LRRC17	-4.37925	0.00129537
ENSG00000265194	-4.15836	0.0440269	hsa-miR-130a-5p	ZFHX4	-3.01481	0.00650267
ENSG00000265194	-4.15836	0.0440269	hsa-miR-3137	PTPRD	-2.77341	0.0371438
ENSG00000271086	-4.90657	0.00724202	hsa-miR-574-5p	NRN1	-2.32809	0.011713
ENSG00000271086	-4.90657	0.00724202	hsa-miR-18a-3p	EPHA7	-4.5165	0.00229469
ENSG00000271086	-4.90657	0.00724202	hsa-miR-2114-3p	KIAA1549	-2.68992	0.0301242
ENSG00000271086	-4.90657	0.00724202	hsa-miR-146a-3p	PCDH19	-3.78648	0.00466438
ENSG00000271086	-4.90657	0.00724202	hsa-miR-488-3p	DCX	-3.33852	0.0477124
ENSG00000271086	-4.90657	0.00724202	hsa-miR-3620-3p	ZFHX4	-3.01481	0.00650267
ENSG00000271086	-4.90657	0.00724202	hsa-miR-526b-3p	PTPRD	-2.77341	0.0371438
ENSG00000271086	-4.90657	0.00724202	hsa-miR-490-3p	SAPCD2	-1.59631	0.00392469
ENSG00000271086	-4.90657	0.00724202	hsa-miR-3681-5p	FAT3	-3.4243	0.0290241
ENSG00000271086	-4.90657	0.00724202	hsa-miR-515-5p	ANKRD30A	-6.60203	0.00152466
ENSG00000271086	-4.90657	0.00724202	hsa-miR-3159	DACH1	-2.6581	0.0292171
ENSG00000271086	-4.90657	0.00724202	hsa-miR-654-5p	JPH4	-4.79235	0.00839916
ENSG00000271086	-4.90657	0.00724202	hsa-miR-4270	NYNRIN	-2.60188	0.0499189
ENSG00000271086	-4.90657	0.00724202	hsa-miR-4685-5p	SLC8A3	-3.88756	0.00503247
ENSG00000271086	-4.90657	0.00724202	hsa-miR-1304-5p	MEIS2	-2.60467	0.0168225
ENSG00000271086	-4.90657	0.00724202	hsa-miR-3148	IGF2BP1	-7.63704	3.86053e-06
ENSG00000271086	-4.90657	0.00724202	hsa-miR-383-5p	DOK6	-2.67895	0.000571098
ENSG00000276476	-3.35217	0.0469752	hsa-miR-4753-3p	DPP10	-4.72843	0.0433804
ENSG00000276476	-3.35217	0.0469752	hsa-miR-3613-3p	SCD5	-2.01099	0.0140911
ENSG00000276476	-3.35217	0.0469752	hsa-miR-942-5p	EPHA7	-4.5165	0.00229469
ENSG00000276476	-3.35217	0.0469752	hsa-miR-130b-5p	UNC5D	-4.77814	0.0487337
ENSG00000276476	-3.35217	0.0469752	hsa-miR-4533	JPH4	-4.79235	0.00839916
ENSG00000276476	-3.35217	0.0469752	hsa-miR-590-3p	DOK6	-2.67895	0.000571098
ENSG00000276476	-3.35217	0.0469752	hsa-miR-4476	CECR2	-3.1475	0.0252137
ENSG00000230731	-4.36436	0.0474739	hsa-miR-3162-5p	SPHKAP	-5.93769	0.0045546
ENSG00000230731	-4.36436	0.0474739	hsa-miR-1236-3p	GRIA1	-6.61707	0.00152466
ENSG00000230731	-4.36436	0.0474739	hsa-miR-3183	NRN1	-2.32809	0.011713
ENSG00000230731	-4.36436	0.0474739	hsa-miR-149-5p	PCDH19	-3.78648	0.00466438
ENSG00000230731	-4.36436	0.0474739	hsa-miR-328-3p	DCX	-3.33852	0.0477124
ENSG00000230731	-4.36436	0.0474739	hsa-miR-3620-3p	ZFHX4	-3.01481	0.00650267
ENSG00000230731	-4.36436	0.0474739	hsa-miR-2052	YBX2	-3.62289	0.0357399
ENSG00000272046	-7.71594	0.0727783	hsa-miR-1295b-5p	DPP10	-4.72843	0.0433804
ENSG00000272046	-7.71594	0.0727783	hsa-miR-1276	EPHA7	-4.5165	0.00229469
ENSG00000272046	-7.71594	0.0727783	hsa-miR-511-5p	PCDH19	-3.78648	0.00466438
ENSG00000272046	-7.71594	0.0727783	hsa-miR-653-5p	DACH1	-2.6581	0.0292171
ENSG00000272046	-7.71594	0.0727783	hsa-miR-513a-3p	JPH4	-4.79235	0.00839916
ENSG00000258998	-3.13995	0.0493177	hsa-miR-3606-5p	VASH2	-3.55237	0.0198929
ENSG00000258998	-3.13995	0.0493177	hsa-miR-676-5p	MAGEC2	-12.324	0.0258086
ENSG00000258998	-3.13995	0.0493177	hsa-miR-4282	DACH1	-2.6581	0.0292171
ENSG00000258998	-3.13995	0.0493177	hsa-miR-513a-3p	JPH4	-4.79235	0.00839916
ENSG00000258998	-3.13995	0.0493177	hsa-miR-548p	MEIS2	-2.60467	0.0168225
ENSG00000258998	-3.13995	0.0493177	hsa-miR-590-3p	DOK6	-2.67895	0.000571098
ENSG00000214548	-3.18953	0.020031	hsa-miR-378a-5p	SYPL2	-1.84219	0.0377062
ENSG00000214548	-3.18953	0.020031	hsa-miR-330-3p	ST6GAL2	-4.39965	0.0250187
ENSG00000214548	-3.18953	0.020031	hsa-miR-5696	DPP10	-4.72843	0.0433804
ENSG00000214548	-3.18953	0.020031	hsa-miR-188-3p	NRN1	-2.32809	0.011713
ENSG00000214548	-3.18953	0.020031	hsa-miR-211-5p	EPHA7	-4.5165	0.00229469
ENSG00000214548	-3.18953	0.020031	hsa-miR-548ar-3p	PCLO	-2.67785	0.0476229
ENSG00000214548	-3.18953	0.020031	hsa-miR-589-3p	LRRC17	-4.37925	0.00129537
ENSG00000214548	-3.18953	0.020031	hsa-miR-511-5p	PCDH19	-3.78648	0.00466438
ENSG00000214548	-3.18953	0.020031	hsa-miR-7-5p	DCX	-3.33852	0.0477124
ENSG00000214548	-3.18953	0.020031	hsa-miR-4290	UNC5D	-4.77814	0.0487337
ENSG00000214548	-3.18953	0.020031	hsa-miR-4687-5p	SLCO5A1	-3.46521	0.0323533
ENSG00000214548	-3.18953	0.020031	hsa-miR-495-3p	ZFHX4	-3.01481	0.00650267
ENSG00000214548	-3.18953	0.020031	hsa-miR-579-3p	PTPRD	-2.77341	0.0371438
ENSG00000214548	-3.18953	0.020031	hsa-miR-4709-3p	CNTFR	-4.37949	0.0184695
ENSG00000214548	-3.18953	0.020031	hsa-miR-3689d	BRSK2	-3.84437	0.0288296
ENSG00000214548	-3.18953	0.020031	hsa-miR-762	SYT7	-2.49463	0.0318637
ENSG00000214548	-3.18953	0.020031	hsa-miR-26a-2-3p	GAL	-4.61154	0.0467209
ENSG00000214548	-3.18953	0.020031	hsa-miR-1254	FAT3	-3.4243	0.0290241
ENSG00000214548	-3.18953	0.020031	hsa-miR-1226-3p	ASIC1	-2.3285	0.00724736
ENSG00000214548	-3.18953	0.020031	hsa-miR-4533	JPH4	-4.79235	0.00839916
ENSG00000214548	-3.18953	0.020031	hsa-miR-105-5p	FLRT2	-2.70537	0.0301687
ENSG00000214548	-3.18953	0.020031	hsa-let-7e-5p	IGF2BP1	-7.63704	3.86053e-06
ENSG00000214548	-3.18953	0.020031	hsa-miR-186-3p	DOK6	-2.67895	0.000571098
ENSG00000214548	-3.18953	0.020031	hsa-miR-1914-5p	HIF3A	-3.69055	0.0283599
ENSG00000214548	-3.18953	0.020031	hsa-miR-4476	CECR2	-3.1475	0.0252137
ENSG00000258399	-4.51411	0.00724736	hsa-miR-1283	NUDT11	-3.87869	0.000693986
ENSG00000258399	-4.51411	0.00724736	hsa-miR-571	ZFHX4	-3.01481	0.00650267
ENSG00000258399	-4.51411	0.00724736	hsa-miR-506-3p	TUB	-2.58324	1.88469e-07
ENSG00000225746	-4.02205	0.0179388	hsa-miR-378a-5p	SYPL2	-1.84219	0.0377062
ENSG00000225746	-4.02205	0.0179388	hsa-miR-3606-5p	VASH2	-3.55237	0.0198929
ENSG00000225746	-4.02205	0.0179388	hsa-miR-516b-3p	ST6GAL2	-4.39965	0.0250187
ENSG00000225746	-4.02205	0.0179388	hsa-miR-218-5p	EPHA7	-4.5165	0.00229469
ENSG00000225746	-4.02205	0.0179388	hsa-miR-3682-3p	FUT9	-7.00745	0.0333022
ENSG00000225746	-4.02205	0.0179388	hsa-miR-500a-5p	PTPRD	-2.77341	0.0371438
ENSG00000225746	-4.02205	0.0179388	hsa-miR-140-3p	MEIS2	-2.60467	0.0168225
ENSG00000225746	-4.02205	0.0179388	hsa-miR-1207-3p	IGF2BP1	-7.63704	3.86053e-06
ENSG00000261426	-4.59528	0.0342711	hsa-miR-548c-3p	EPHA3	-3.49115	0.0324845
ENSG00000261426	-4.59528	0.0342711	hsa-miR-27b-3p	KCTD8	-4.13172	0.0079851
ENSG00000261426	-4.59528	0.0342711	hsa-miR-149-5p	PCDH19	-3.78648	0.00466438
ENSG00000261426	-4.59528	0.0342711	hsa-miR-335-3p	PTPRD	-2.77341	0.0371438
ENSG00000261426	-4.59528	0.0342711	hsa-miR-147a	IGF2	-6.37624	0.00503247
ENSG00000261426	-4.59528	0.0342711	hsa-miR-3915	MEIS2	-2.60467	0.0168225
ENSG00000261426	-4.59528	0.0342711	hsa-miR-2052	YBX2	-3.62289	0.0357399
ENSG00000259370	-4.58311	0.0395974	hsa-miR-4753-3p	DPP10	-4.72843	0.0433804
ENSG00000259370	-4.58311	0.0395974	hsa-miR-513a-3p	JPH4	-4.79235	0.00839916
ENSG00000259370	-4.58311	0.0395974	hsa-miR-4306	COCH	-3.38837	0.0459634
ENSG00000259370	-4.58311	0.0395974	hsa-miR-550a-5p	HIF3A	-3.69055	0.0283599
ENSG00000258754	-4.15232	0.0703828	hsa-miR-378a-5p	SYPL2	-1.84219	0.0377062
ENSG00000258754	-4.15232	0.0703828	hsa-miR-2053	ST6GAL2	-4.39965	0.0250187
ENSG00000258754	-4.15232	0.0703828	hsa-miR-514a-5p	DPP10	-4.72843	0.0433804
ENSG00000258754	-4.15232	0.0703828	hsa-miR-1287-5p	VIPR2	-5.35372	0.00078795
ENSG00000258754	-4.15232	0.0703828	hsa-miR-1283	NUDT11	-3.87869	0.000693986
ENSG00000258754	-4.15232	0.0703828	hsa-miR-449a	CAPN6	-5.63797	0.00455144
ENSG00000258754	-4.15232	0.0703828	hsa-miR-432-5p	SLCO5A1	-3.46521	0.0323533
ENSG00000258754	-4.15232	0.0703828	hsa-miR-3614-3p	PTPRD	-2.77341	0.0371438
ENSG00000258754	-4.15232	0.0703828	hsa-miR-4270	NYNRIN	-2.60188	0.0499189
ENSG00000258754	-4.15232	0.0703828	hsa-miR-3157-5p	MEIS2	-2.60467	0.0168225
ENSG00000258754	-4.15232	0.0703828	hsa-miR-3652	EFNB3	-1.98736	0.0162853
ENSG00000258754	-4.15232	0.0703828	hsa-miR-1207-3p	IGF2BP1	-7.63704	3.86053e-06
ENSG00000258754	-4.15232	0.0703828	hsa-miR-3612	HIF3A	-3.69055	0.0283599
ENSG00000250685	-6.72355	0.00335501	hsa-miR-541-3p	JPH4	-4.79235	0.00839916
ENSG00000250685	-6.72355	0.00335501	hsa-miR-3135b	MEIS2	-2.60467	0.0168225
ENSG00000267009	-3.65156	0.0450666	hsa-miR-4319	ENPEP	-1.89205	0.0166986
ENSG00000267009	-3.65156	0.0450666	hsa-miR-4270	NYNRIN	-2.60188	0.0499189
ENSG00000228709	-4.67103	0.0384673	hsa-miR-4742-3p	DPP10	-4.72843	0.0433804
ENSG00000228709	-4.67103	0.0384673	hsa-miR-181a-2-3p	SPHKAP	-5.93769	0.0045546
ENSG00000228709	-4.67103	0.0384673	hsa-miR-384	STXBP5L	-3.98829	0.000113206
ENSG00000228709	-4.67103	0.0384673	hsa-miR-583	ENPEP	-1.89205	0.0166986
ENSG00000228709	-4.67103	0.0384673	hsa-miR-1236-3p	GRIA1	-6.61707	0.00152466
ENSG00000228709	-4.67103	0.0384673	hsa-miR-3183	NRN1	-2.32809	0.011713
ENSG00000228709	-4.67103	0.0384673	hsa-miR-4311	EPHA7	-4.5165	0.00229469
ENSG00000228709	-4.67103	0.0384673	hsa-miR-23a-5p	IGF2	-6.37624	0.00503247
ENSG00000228709	-4.67103	0.0384673	hsa-miR-548p	MEIS2	-2.60467	0.0168225
ENSG00000228709	-4.67103	0.0384673	hsa-miR-4257	HIF3A	-3.69055	0.0283599
ENSG00000215424	-1.50655	0.0477124	hsa-miR-888-5p	ST6GAL2	-4.39965	0.0250187
ENSG00000215424	-1.50655	0.0477124	hsa-miR-548aj-3p	DPP10	-4.72843	0.0433804
ENSG00000215424	-1.50655	0.0477124	hsa-miR-1272	STXBP5L	-3.98829	0.000113206
ENSG00000215424	-1.50655	0.0477124	hsa-miR-548x-3p	DGKB	-3.52336	0.0295124
ENSG00000215424	-1.50655	0.0477124	hsa-miR-548g-3p	ZFHX4	-3.01481	0.00650267
ENSG00000215424	-1.50655	0.0477124	hsa-miR-335-3p	PTPRD	-2.77341	0.0371438
ENSG00000215424	-1.50655	0.0477124	hsa-miR-28-5p	CNTFR	-4.37949	0.0184695
ENSG00000215424	-1.50655	0.0477124	hsa-miR-527	SYT7	-2.49463	0.0318637
ENSG00000215424	-1.50655	0.0477124	hsa-miR-1237-3p	ASIC1	-2.3285	0.00724736
ENSG00000215424	-1.50655	0.0477124	hsa-miR-93-3p	MTUS2	-2.93639	0.00871754
ENSG00000215424	-1.50655	0.0477124	hsa-miR-15a-5p	NYNRIN	-2.60188	0.0499189
ENSG00000215424	-1.50655	0.0477124	hsa-miR-2276-3p	ALDH1A2	-3.99072	0.00908954
